# Supplementary material for: Remote Learning Barriers and Opportunities for Graduate Student and Postdoctoral Learners in Career and Professional Skill Development: A Case Study
Source: PubMed Central journal article supplement — J Microbiol Biol Educ. 2021 Mar 31;22(1):22.1.74. doi: 10.1128/jmbe.v22i1.2451 (PMC8060135; doi:10.1128/jmbe.v22i1.2451), 2021-03-31
Supplement: JMBE-22-74-S001.pdf [file JMBE-22-74-S001.pdf]

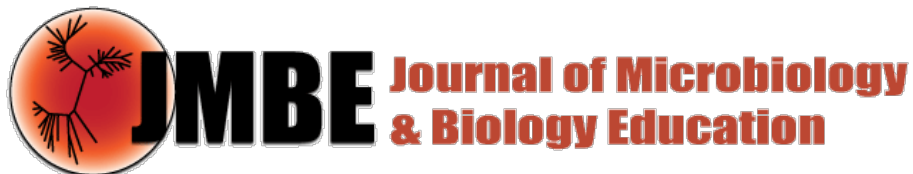

---

## Supplemental Materials

for

# Remote Learning Barriers and Opportunities for Graduate Student and Postdoctoral Learners in Career and Professional Skill Development: A Case Study

Margery Evans Gardner, Elizabeth C. Bodiya, and Shoba Subramanian\*

*Office of Graduate and Postdoctoral Studies, University of Michigan Medical School, Ann Arbor, MI 48109*

## Table of Contents

(Total pages 10)

Appendix 1: Survey questions

Appendix 2: Supplemental data

\*Corresponding author. Mailing address: University of Michigan Medical School, 1135 Catherine St., Ann Arbor, MI 48109. Phone: 734-615-6511. E-mail: [shobas@umich.edu](mailto:shobas@umich.edu).  
Received: 1 October 2020, Accepted: 17 February 2021,  
Published: 31 March 2021

©2021 Author(s). Published by the American Society for Microbiology. This is an Open Access article distributed under the terms of the Creative Commons Attribution-Noncommercial-NoDerivatives 4.0 International license (<https://creativecommons.org/licenses/by-nc-nd/4.0/>) and <https://creativecommons.org/licenses/by-nc-nd/4.0/legalcode>, which grants the public the nonexclusive right to copy, distribute, or display the published work.

## Block 1

Thank you for taking 5 minutes to complete this survey. The survey will ask questions about your participation and engagement in remote career and professional development activities from March – August 2020. It will also ask for your preference about the format of future professional development events.

Participation is completely voluntary and response to any survey questions indicates your consent. Data collection is anonymous, however; once the survey is initiated (answering a question), your data cannot be removed. There are no negative consequences to participation, whatever you decide. If you have any questions or concerns, please contact Shoba Subramanian at *<email and phone number provided here>*. More details on the research and consent here *<link to consent here>*.

**Since the COVID-19 Work-From-Home and Research Ramp-Down response in March, have you engaged in career and professional development activities (workshops, webinars, etc.) with...**

|                                                         | Yes                   | No                    | Not Sure              |
|---------------------------------------------------------|-----------------------|-----------------------|-----------------------|
| the Office of Graduate and Postdoctoral Studies (OGPS)? | <input type="radio"/> | <input type="radio"/> | <input type="radio"/> |

|                                                                                | Yes                   | No                    | Not Sure              |
|--------------------------------------------------------------------------------|-----------------------|-----------------------|-----------------------|
| other University of Michigan offices (University Career Center, Rackham, etc)? | <input type="radio"/> | <input type="radio"/> | <input type="radio"/> |
| outside the university (NIH, Coursera, etc)?                                   | <input type="radio"/> | <input type="radio"/> | <input type="radio"/> |

Has your **frequency** of participation in professional development activities during Work-From-Home **increased** in comparison to before Work-From-Home?

| Yes                   | No                    | Not Sure              |
|-----------------------|-----------------------|-----------------------|
| <input type="radio"/> | <input type="radio"/> | <input type="radio"/> |

**Based on the professional development events you attended during Work-From-Home, please share how much each factor influenced your decision to participate.**

|                                                        | Not a factor in attending | Somewhat of a factor in attending | Strong factor in attending | N/A                   |
|--------------------------------------------------------|---------------------------|-----------------------------------|----------------------------|-----------------------|
| Flexible schedule during Work-From-Home                | <input type="radio"/>     | <input type="radio"/>             | <input type="radio"/>      | <input type="radio"/> |
| Virtual format (e.g. Zoom)                             | <input type="radio"/>     | <input type="radio"/>             | <input type="radio"/>      | <input type="radio"/> |
| Encouragement from my PI to attend events              | <input type="radio"/>     | <input type="radio"/>             | <input type="radio"/>      | <input type="radio"/> |
| Increased awareness of professional development events | <input type="radio"/>     | <input type="radio"/>             | <input type="radio"/>      | <input type="radio"/> |
| Pressure to go on the job market soon                  | <input type="radio"/>     | <input type="radio"/>             | <input type="radio"/>      | <input type="radio"/> |

|                                                                                                           | Not a factor<br>in attending | Somewhat of<br>a factor in<br>attending | Strong factor<br>in attending | N/A                   |
|-----------------------------------------------------------------------------------------------------------|------------------------------|-----------------------------------------|-------------------------------|-----------------------|
| Interest in new science communication offerings (manuscript writing, peer review, adobe illustrator etc.) | <input type="radio"/>        | <input type="radio"/>                   | <input type="radio"/>         | <input type="radio"/> |
| Other<br><input type="text"/>                                                                             | <input type="radio"/>        | <input type="radio"/>                   | <input type="radio"/>         | <input type="radio"/> |

**What barriers have you faced before and during Work-From-Home that have impacted your ability to participate in professional development activities?**

|                                         | BEFORE Work-<br>From-Home | DURING Work-<br>From-Home | Neither                  |
|-----------------------------------------|---------------------------|---------------------------|--------------------------|
| Conflict with date/time                 | <input type="checkbox"/>  | <input type="checkbox"/>  | <input type="checkbox"/> |
| Unaware of offerings                    | <input type="checkbox"/>  | <input type="checkbox"/>  | <input type="checkbox"/> |
| Conflict with research responsibilities | <input type="checkbox"/>  | <input type="checkbox"/>  | <input type="checkbox"/> |
| Lack of PI support                      | <input type="checkbox"/>  | <input type="checkbox"/>  | <input type="checkbox"/> |
| Transportation/Location                 | <input type="checkbox"/>  | <input type="checkbox"/>  | <input type="checkbox"/> |
| Caring for dependants                   | <input type="checkbox"/>  | <input type="checkbox"/>  | <input type="checkbox"/> |
| Lack of stable internet                 | <input type="checkbox"/>  | <input type="checkbox"/>  | <input type="checkbox"/> |
| Feeling overwhelmed                     | <input type="checkbox"/>  | <input type="checkbox"/>  | <input type="checkbox"/> |
| Personal conflict                       | <input type="checkbox"/>  | <input type="checkbox"/>  | <input type="checkbox"/> |
| Other<br><input type="text"/>           | <input type="checkbox"/>  | <input type="checkbox"/>  | <input type="checkbox"/> |

**In what ways do you prefer to engage in a virtual event? Select all that apply.**

- Listen only
- Listen and video on
- Respond to Polls
- Breakout rooms (small group discussion/activity)

- Watch session recording afterward
- Other

**In what ways do you prefer to engage with a presenter during a virtual session?  
Select all that apply.**

- Submit questions before the event
- Ask questions or comments via the chat
- Unmute and ask questions verbally
- Respond to polls
- Follow-up with presenter (e.g. via email)

**As we look to future semesters when in-person career & professional events are a safe option, which would you prefer?**

- I would prefer to engage in remote events most of the time.
- I would prefer to engage in in-person events most of the time.

**Select 3 reasons you would prefer mostly remote career & professional development activities in the future.**

- I don't lose time on cross-campus transportation
- I learn equally as good or better in remote situations
- I have caregiving duties and remote learning helps me juggle duties
- I feel more comfortable with virtual engagement (e.g. posting questions in chat vs asking questions in person)
- Remote learning permits inclusive teaching such as closed captioning, which I find helpful
- I am able to watch recorded sessions afterward
- Remote options help me to prioritize career & development activities, despite other barriers
- Other

Select 3 reasons you would prefer in person career & professional development activities in the future.

- I learn better when my instructor is physically in the same space (e.g. enables asking questions; organic engagement)
- I prefer when my environment resembles a physical classroom (including presence of my peers)
- I prefer the social interaction of in-person events
- I find it hard to stay focused during remote activities
- An in-person event encourages me to leave the lab/work for a short time
- I prioritize in-person career & professional development activities more than remote options
- Other

In response to the pandemic, OGPS launched a new science communication series. To support our future planning, please identify which topics you'd be interested in the future for an advanced and/or a repeat session.

- Creating Figures in Illustrator (Dr. Barolo)
- Writing Review Articles (Dr. Hagan)
- Manuscript Writing (Dr. Puthenveedu)
- Manuscript Peer Review (Dr. O'Riordan)
- Giving Scientific Presentations (Dr. Schnell)

Are you affiliated with the Medical School? (e.g. PI is part of the Medical School; you are in a PIBS dept or OGPS program)

Yes

No

I am a ...

- MS Student
- PhD Student
- Postdoctoral Fellow
- Other

**What year of your training are you in?**

**How would you describe your gender?**

- Male
- Female
- Prefer to self describe as \_\_\_\_\_ (non-binary, gender-fluid, agender,  please specify)
- Prefer not to say

**Do you identify with a group under-represented in STEM? (e.g., Black, Latinx, Native American)**

- Yes
- No
- Prefer not to say

**Are you a domestic or international trainee?**

- Domestic
- International
- Prefer not to say

**Please share any additional comments or suggestions. This survey is anonymous.**

Thank you for participating. Be well!

Powered by Qualtrics



**Supplemental Data 2A: CPD ad-hoc programs before and during WFH**

| <b>Date</b> | <b>Topic</b>                                                          | <b>RSVPs</b> | <b>Attended</b> | <b>% RSVPs Attended</b> |
|-------------|-----------------------------------------------------------------------|--------------|-----------------|-------------------------|
| 1/24/19     | Informational Interviews, Elevator                                    | 33           | 17              | 52%                     |
| 2/8/19      | Transferable Skills                                                   | 24           | 15              | 63%                     |
| 2/21/19     | Time Mangement                                                        | 53           | 29              | 55%                     |
| 3/1/19      | CVs, Resumes, and LinkedIn                                            | 61           | 39              | 64%                     |
| 3/7/19      | Leadership                                                            | 53           | 22              | 42%                     |
| 3/22/19     | Cover Letters                                                         | 61           | 26              | 43%                     |
| 4/11/19     | Interviewing Skills                                                   | 54           | 27              | 50%                     |
| 4/25/19     | Poster Presentations                                                  | 46           | 22              | 48%                     |
| 8/2/19      | To Postdoc or Not                                                     | 24           | 9               | 38%                     |
| 8/8/19      | Postdoc Panel                                                         | 22           | 15              | 68%                     |
| 9/13/19     | Networking                                                            | 36           | 15              | 42%                     |
| 9/27/19     | CVs and Biosketch                                                     | 46           | 24              | 52%                     |
| 10/3/19     | Resumes                                                               | 46           | 18              | 39%                     |
| 10/11/19    | Cover Letters                                                         | 75           | 33              | 44%                     |
| 10/25/19    | Research, Teaching, and Diversity Statements for Faculty Applications | 86           | 25              | 29%                     |
| 10/31/19    | Career Exploration (career agnostic) and Individual Development Plans | 28           | 17              | 61%                     |
| 11/7/19     | Networking                                                            | 29           | 9               | 31%                     |
| 11/15/19    | Informational Interviews and Elevator                                 | 33           | 14              | 42%                     |
| 1/17/20     | CVs and Resumes                                                       | 41           | 21              | 51%                     |
| 1/23/20     | Career Exploration - Academic                                         | 32           | 23              | 72%                     |
| 1/30/20     | Career Exploration - Academic                                         | 20           | 11              | 55%                     |
| 2/14/20     | Cover Letters                                                         | 20           | 15              | 75%                     |
| 3/19/20     | Interview Skills                                                      | 75           | 20              | 27%                     |
| 3/27/20     | Career Exploration (Career Agnostic)                                  | 19           | 11              | 58%                     |
| 4/24/20     | Career Exploration - Technology                                       | 41           | 29              | 71%                     |
| 4/30/20     | Career Exploration - Technology                                       | 53           | 37              | 70%                     |
| 5/13/20     | Career Exploration (Career Agnostic)                                  | 44           | 22              | 50%                     |
| 5/21/20     | Networking                                                            | 66           | 24              | 36%                     |
| 5/28/20     | Networking                                                            | 73           | 16              | 22%                     |
| 6/11/20     | Transferable Skills                                                   | 82           | 39              | 48%                     |
| 6/23/20     | CVs and Resumes                                                       | 112          | 31              | 28%                     |
| 6/30/20     | Interviewing Skills                                                   | 89           | 41              | 46%                     |
| 7/9/20      | Interviewing Skills                                                   | 66           | 10              | 15%                     |
| 7/16/20     | Teaching & Diversity Statements for Faculty Applications              | 121          | 59              | 49%                     |
| 7/24/20     | Research Statement for Faculty Applications                           | 167          | 47              | 28%                     |
| 7/31/20     | Cover Letters                                                         | 128          | 38              | 30%                     |
| 8/6/20      | Delivering a Job Talk                                                 | 94           | 28              | 30%                     |

**Supplemental Data 2B: Science Communication workshops during WFH**

| <b>Date</b> | <b>Topic</b>                                       | <b>RSVPs</b> | <b>Attended</b> | <b>% RSVPs Attended</b> |
|-------------|----------------------------------------------------|--------------|-----------------|-------------------------|
| 4/21/20     | Making Figures in Adobe Illustrator - Basics       | 312          | 171             | 55%                     |
| 4/27/20     | Writing a Review Article                           | 400          | 304             | 76%                     |
| 5/8/20      | Making Figures in Adobe Illustrator - Intermediate | 278          | 157             | 56%                     |
| 5/19/20     | Writing a Scientific Manuscript – Part 1           | 345          | 195             | 57%                     |
| 5/21/20     | Writing a Scientific Manuscript – Part 2           | 350          | 148             | 42%                     |
| 5/27/20     | Understanding the Peer Review Process              | 142          | 75              | 53%                     |
| 6/9/20      | Delivering Scientific Presentations                | 146          | 91              | 62%                     |
